# Supplementary material for: Differences in BVOC oxidation and SOA formation above and below the forest canopy
Source: Copernicus journal article supplement (doi:10.5194/acp-17-1805-2017), 2017-02-07
Supplement: Supplementary file 1 [file acp-17-1805-2017-supplement.pdf]

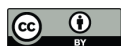

*Supplement of*

## **Differences in BVOC oxidation and SOA formation above and below the forest canopy**

**Benjamin C. Schulze et al.**

*Correspondence to:* Robert J. Griffin (rob.griffin@rice.edu)

The copyright of individual parts of the supplement might differ from the CC-BY 3.0 licence.

**Table S1.** Description of values used in calculation of deposition velocities of particles and gases<sup>1</sup>. H indicates Henry's Law Coefficient,  $f_o$  is the reactivity factor, and MCM species indicates to which compounds (or classes of compounds) the parameters were applied.

| Name                   | Diffusivity<br>( $\text{m}^2 \text{s}^{-1}$ ) | H<br>( $\text{M atm}^{-1}$ ) | $f_o$ | MCM Species                                           |
|------------------------|-----------------------------------------------|------------------------------|-------|-------------------------------------------------------|
| H2O2                   | $1.75 \times 10^{-5}$                         | $1.1 \times 10^5$            | 1     | Hydrogen Peroxide                                     |
| Formic                 | $1.34 \times 10^{-5}$                         | $5.6 \times 10^3$            | 0     | Formic Acid                                           |
| HNO3                   | $1.15 \times 10^{-5}$                         | $3.2 \times 10^5$            | 1     | Nitric Acid                                           |
| HMHP                   | $1.14 \times 10^{-5}$                         | $1.3 \times 10^6$            | 0.1   | Hydroxymethylhydroperoxide                            |
| HAC                    | $1.06 \times 10^{-5}$                         | $2.0 \times 10^3$            | 0     | Hydroxyacetone                                        |
| PAA                    | $1.04 \times 10^{-5}$                         | $5.2 \times 10^2$            | 0.1   | Peroxyacetic acid                                     |
| HDC4                   | $9.01 \times 10^{-6}$                         | $2.0 \times 10^3$            | 0     | C <sub>4</sub> Hydroxy dicarbonyls                    |
| DHC4                   | $8.92 \times 10^{-6}$                         | $2.0 \times 10^3$            | 0     | C <sub>4</sub> Dihydroxy carbonyls                    |
| HPALD                  | $8.45 \times 10^{-6}$                         | $4.0 \times 10^4$            | 0     | Isoprene hydroperoxyaldehyde                          |
| ISOPOOH/IEPOX          | $8.37 \times 10^{-6}$                         | $4.0 \times 10^4$            | 0     | Isoprene hydroxy-hydroperoxide and epoxides           |
| PROPNN                 | $8.34 \times 10^{-6}$                         | $1.0 \times 10^4$            | 0     | Propanone nitrate                                     |
| ISOPN                  | $7.50 \times 10^{-6}$                         | $5.0 \times 10^3$            | 0     | Isoprene hydroxy nitrates                             |
| MACN/MVKN              | $7.45 \times 10^{-6}$                         | $6.0 \times 10^3$            | 0     | Methacrolein and Methyl vinyl ketone hydroxy nitrates |
| INP                    | $7.12 \times 10^{-6}$                         | $5.0 \times 10^3$            | 0     | Isoprene nitrooxy hydroperoxides                      |
| MTNP                   | $5.98 \times 10^{-6}$                         | $1.0 \times 10^3$            | 0     | Monoterpene nitrooxy hydroperoxides                   |
| ANIT <sup>2</sup>      | $5.98 \times 10^{-6}$                         | $1.0 \times 10^3$            | 0     | Other monoterpene nitrates                            |
| OTHER <sup>2</sup>     | $5.98 \times 10^{-6}$                         | $1.0 \times 10^3$            | 0     | Other $\alpha$ -pinene products                       |
| ISOPOOH <sup>3</sup>   | $8.37 \times 10^{-6}$                         | $1.0 \times 10^4$            | 0     | Other isoprene hydroperoxides                         |
| ISOPNIT <sup>4</sup>   | $7.12 \times 10^{-6}$                         | $5.0 \times 10^3$            | 0     | Other isoprene nitrates                               |
| ISOPOTHER <sup>4</sup> | $7.12 \times 10^{-6}$                         | $5.0 \times 10^3$            | 0     | Other isoprene oxidation products                     |
| RAD <sup>5</sup>       | 0                                             | 0                            | 0     | Alkoxy and peroxy radicals.                           |
| MACR <sup>6</sup>      | $5.02 \times 10^{-5}$                         | $6.5 \times 10^0$            | 1     | Methacrolein                                          |
| MVK <sup>6</sup>       | $5.02 \times 10^{-5}$                         | $4.1 \times 10^1$            | 1     | Methyl vinyl ketone                                   |
| CH3CHO <sup>6</sup>    | $7.12 \times 10^{-6}$                         | $1.5 \times 10^1$            | 0     | Acetaldehyde                                          |
| GLY                    | $4.49 \times 10^{-5}$                         | $4.1 \times 10^4$            | 0     | Glyoxal                                               |
| PAN <sup>6</sup>       | $7.02 \times 10^{-5}$                         | $5.0 \times 10^0$            | 0.1   | Peroxyacetylnitrates                                  |
| ACETOL <sup>6</sup>    | $7.12 \times 10^{-6}$                         | $2.4 \times 10^6$            | 1     | Acetone Alcohol                                       |
| HCHO <sup>6</sup>      | $3.43 \times 10^{-5}$                         | $2.3 \times 10^4$            | 1     | Formaldehyde                                          |
| N2O5 <sup>6</sup>      | $5.81 \times 10^{-5}$                         | $1 \times 10^{20}$           | 1     | Dinitrogen Pentoxide                                  |

<sup>1</sup>Unless otherwise indicated, values obtained from Nguyen et al. (2015).

<sup>2</sup>Values assumed the same as MTNP.

<sup>3</sup>Values assumed the same as ISOPOOH.

<sup>4</sup>Values assumed the same as INP.

<sup>5</sup>Radical species assumed to undergo negligible deposition.

<sup>6</sup>Diffusivity values obtained from Ashworth et al. (2015). Henry's Law coefficients obtained from Sander et al. (1999). Reactivity factor of MACR and MVK adjusted to 1 in accordance with findings of Karl et al. (2010).

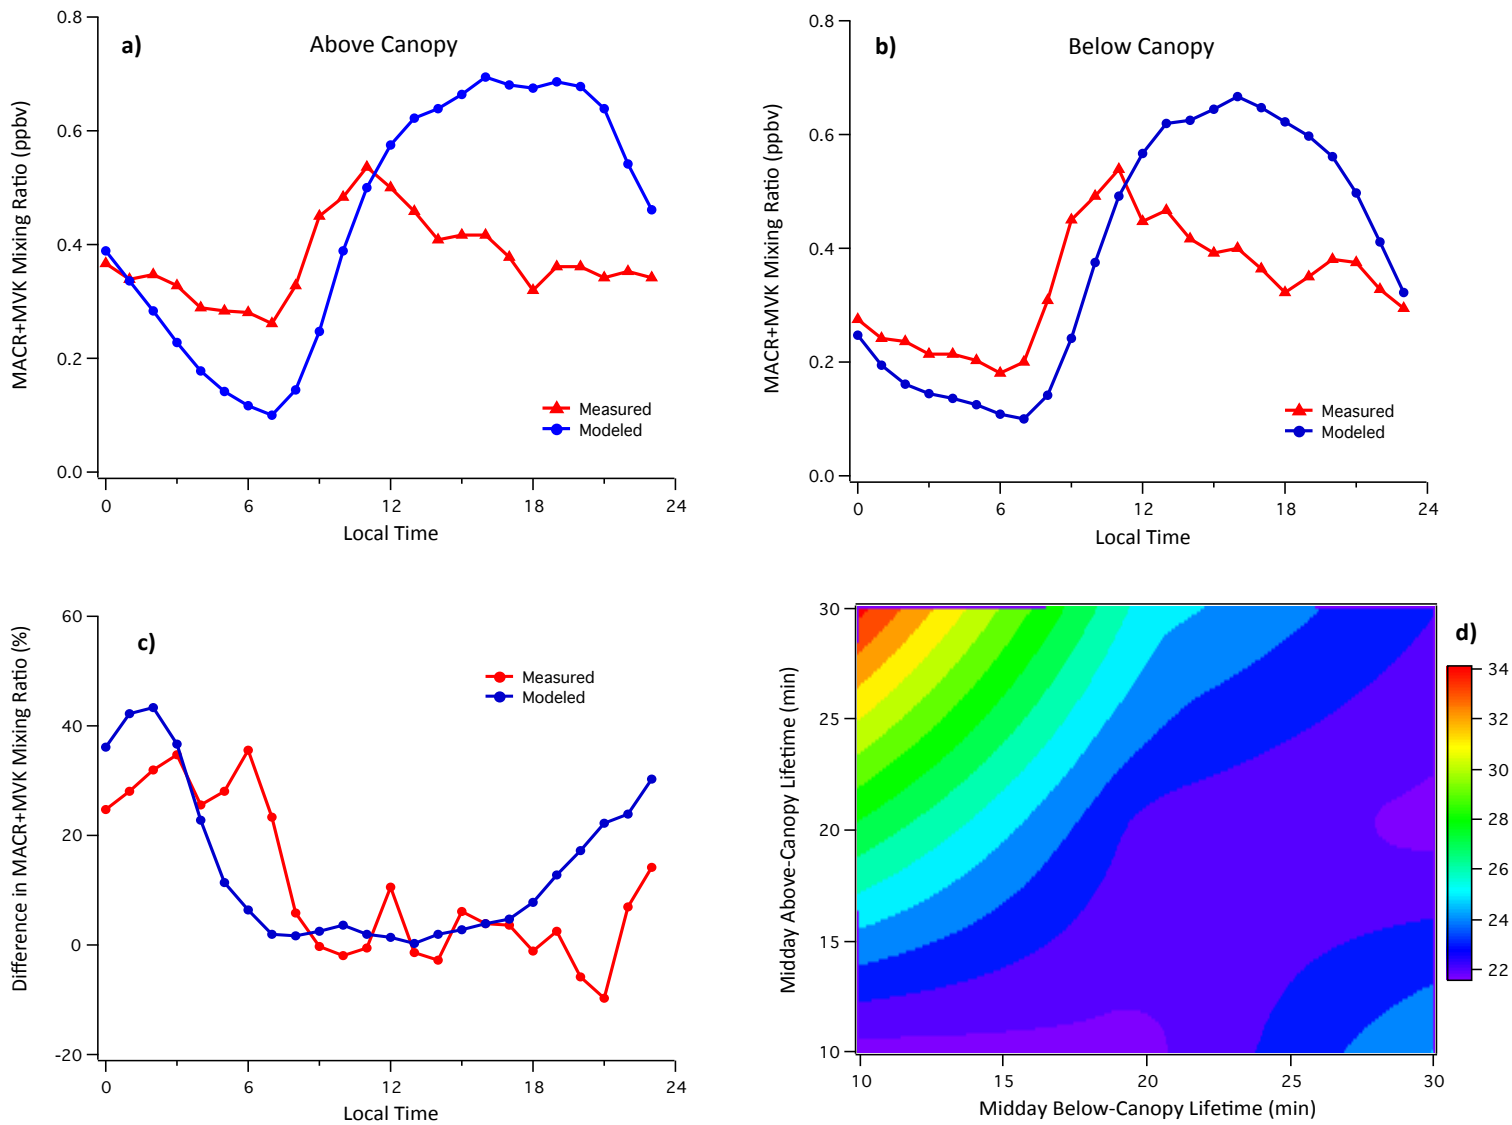

**Figure S1.** Comparison of above-canopy (a) and below-canopy (b) median MACR+MVK measurements during CABINEX 2009 to 0D model predictions. (c) Comparison of the measured and modeled differences (%) in MACR+MVK mixing ratios between the above-canopy and below-canopy environments. Positive values indicate higher concentrations above the canopy than below. (d) Cost function output for analysis of different above and below canopy lifetimes with respect to transport. Smaller values indicate better agreement with measured concentrations.

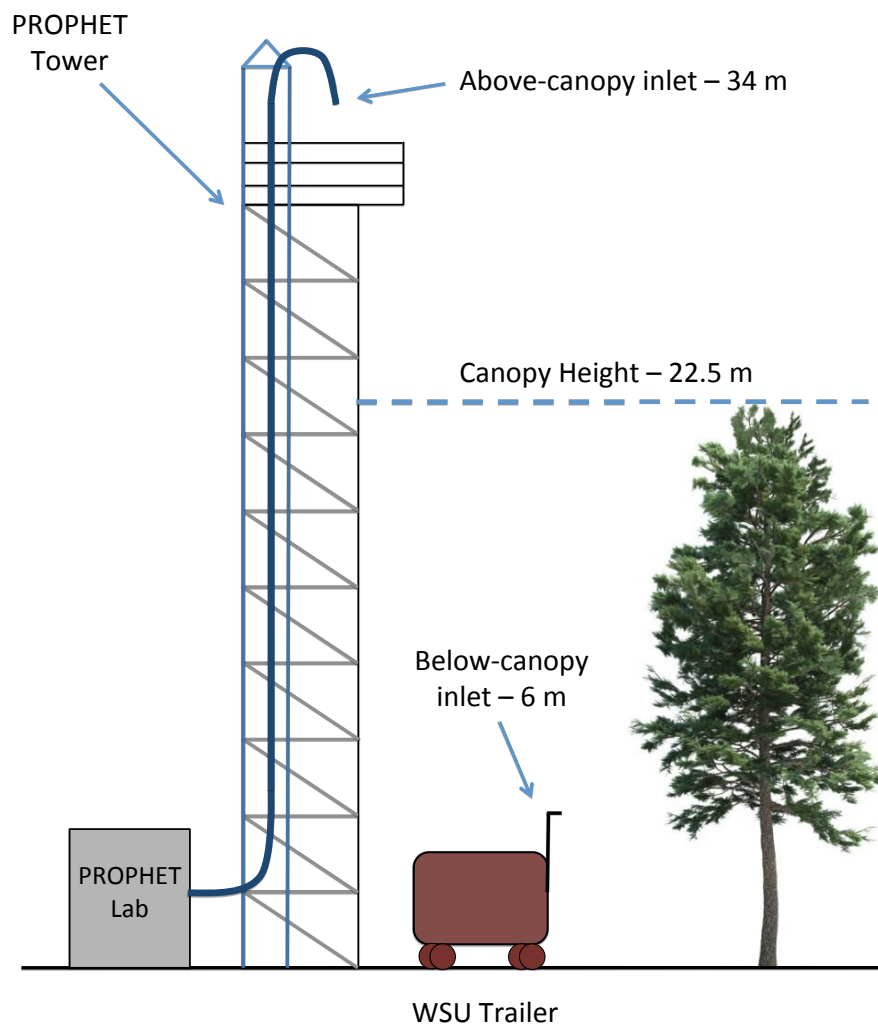

**Figure S2.** Depiction of the PROPHET tower and inlet locations used during CABINEX 2009.

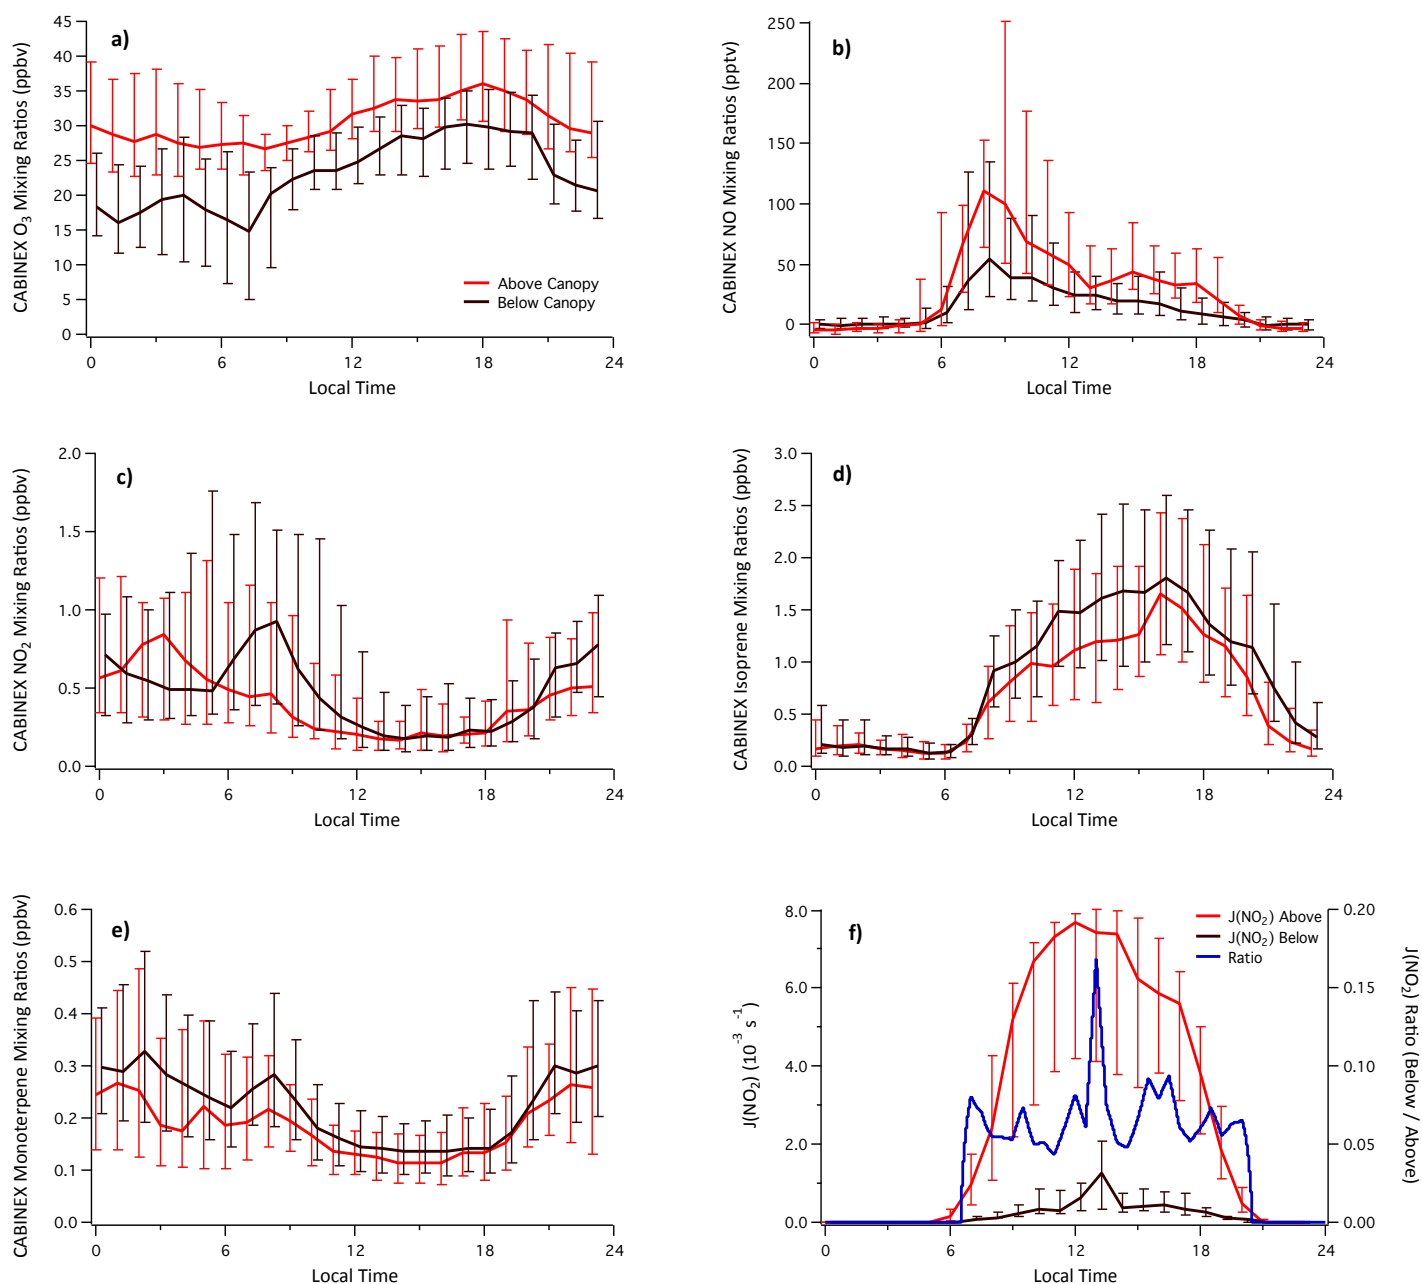

**Figure S3.** CABINEX 2009 measurements of ambient (a)  $\text{O}_3$  (ppbv), (b) NO (pptv), (c)  $\text{NO}_2$  (ppbv), (d) isoprene (ppbv), (e) monoterpenes (ppbv), and (f) the photolysis rate of  $\text{NO}_2$  ( $J(\text{NO}_2)$  ( $10^{-3} \text{ s}^{-1}$ )). Lighter (red) colored lines indicate above-canopy measurements; darker-colored (black) lines indicate below-canopy measurements. Solid lines represent median measured values, while upper and lower bars represent 75<sup>th</sup> and 25<sup>th</sup> percentiles respectively. Below-canopy values have been offset by 15 minutes to aid interpretation.

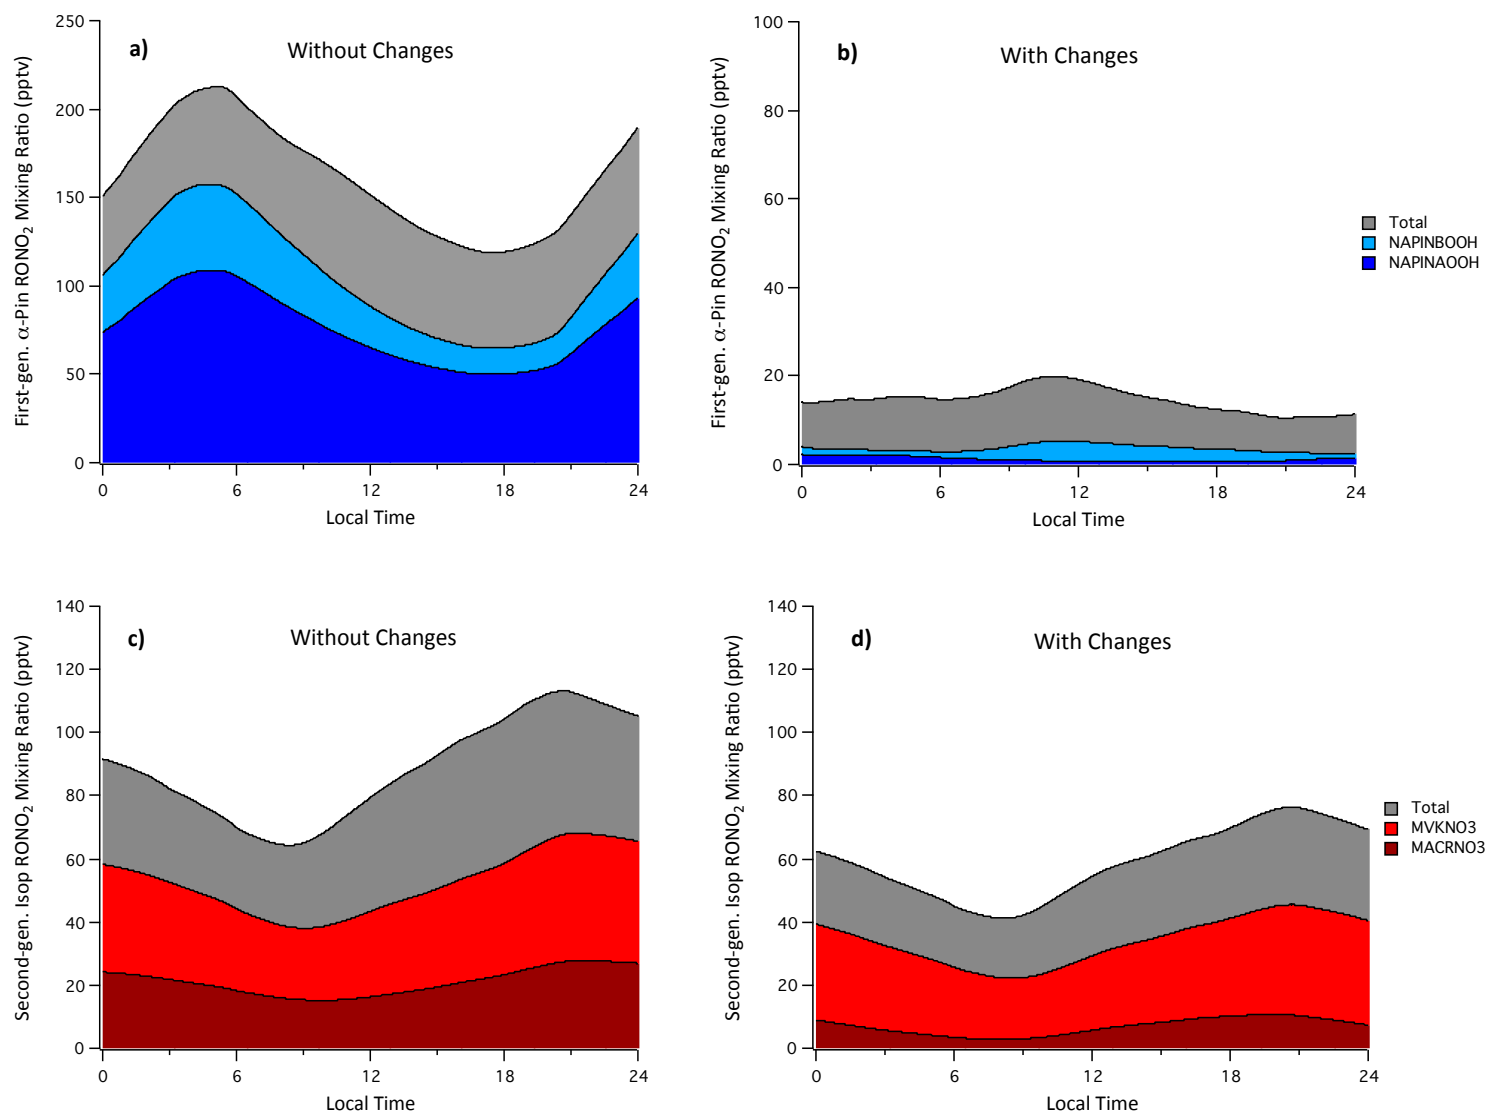

**Figure S4.** Concentrations of major RONO<sub>2</sub> products from  $\alpha$ -pinene (a,b) and isoprene (c,d) above the canopy without (left) and with (right) the changes to the chemical mechanism described in Section 2.6.

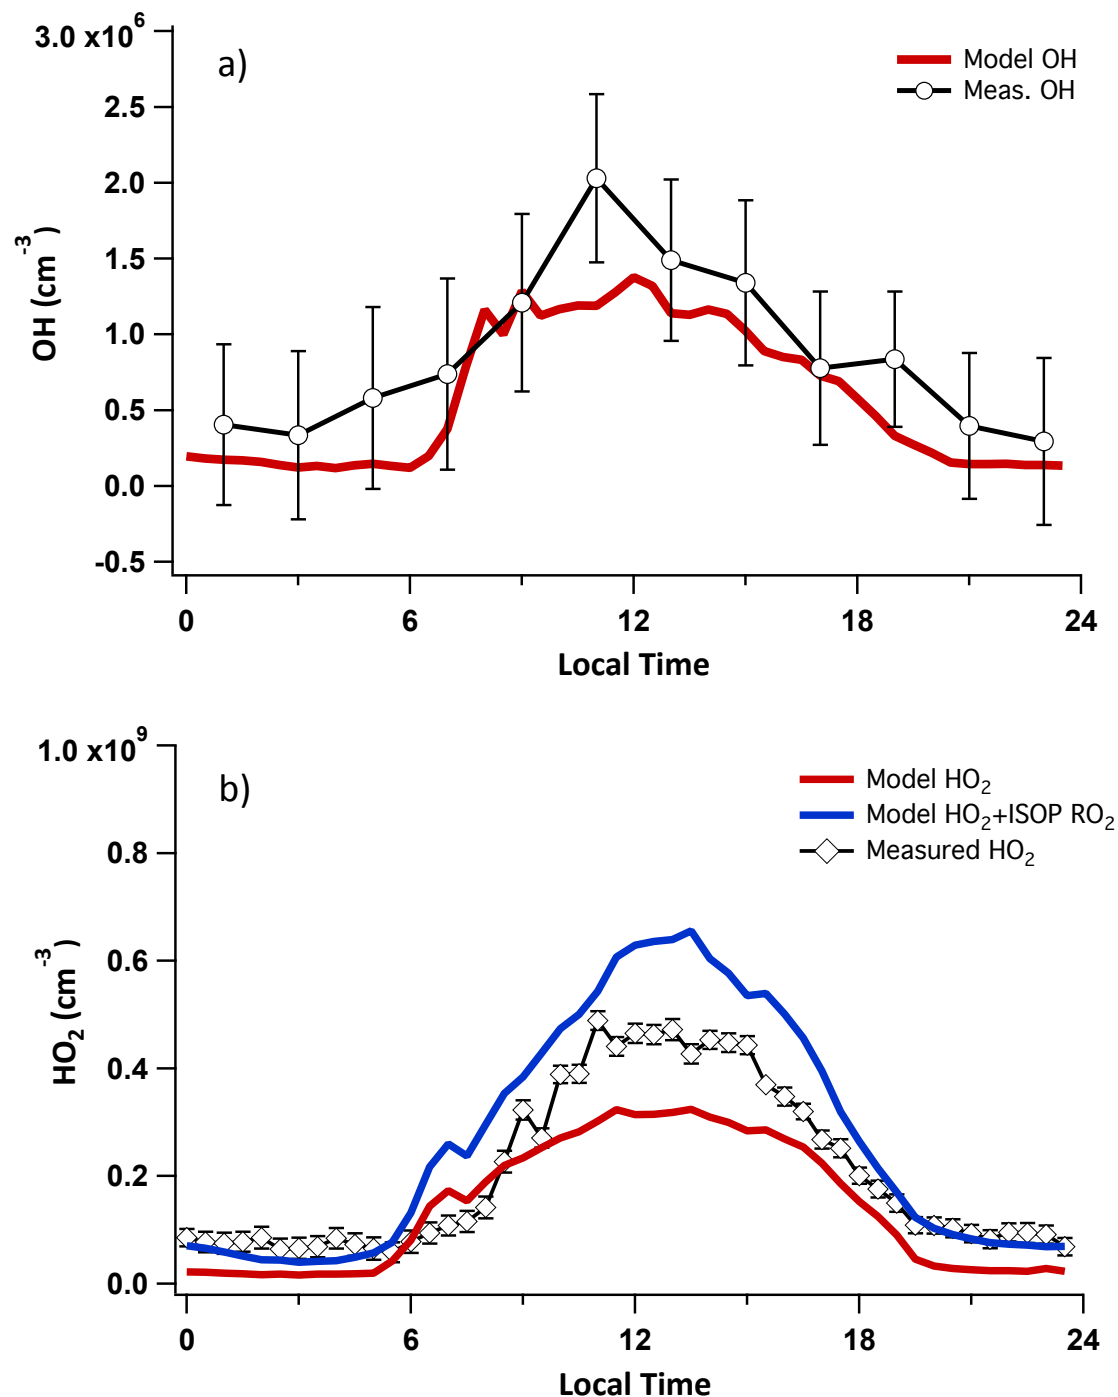

**Figure S5. (a)** Comparison of above-canopy median OH measurements during CABINEX 2009 to 0D model predictions for the ambient CABINEX model scenario. **(b)** Comparison of above-canopy median HO<sub>2</sub> measurements during CABINEX 2009 to 0D model predictions of HO<sub>2</sub> and HO<sub>2</sub> + isoprene RO<sub>2</sub> for the ambient CABINEX model scenario. Error bars indicate median measurement precision.

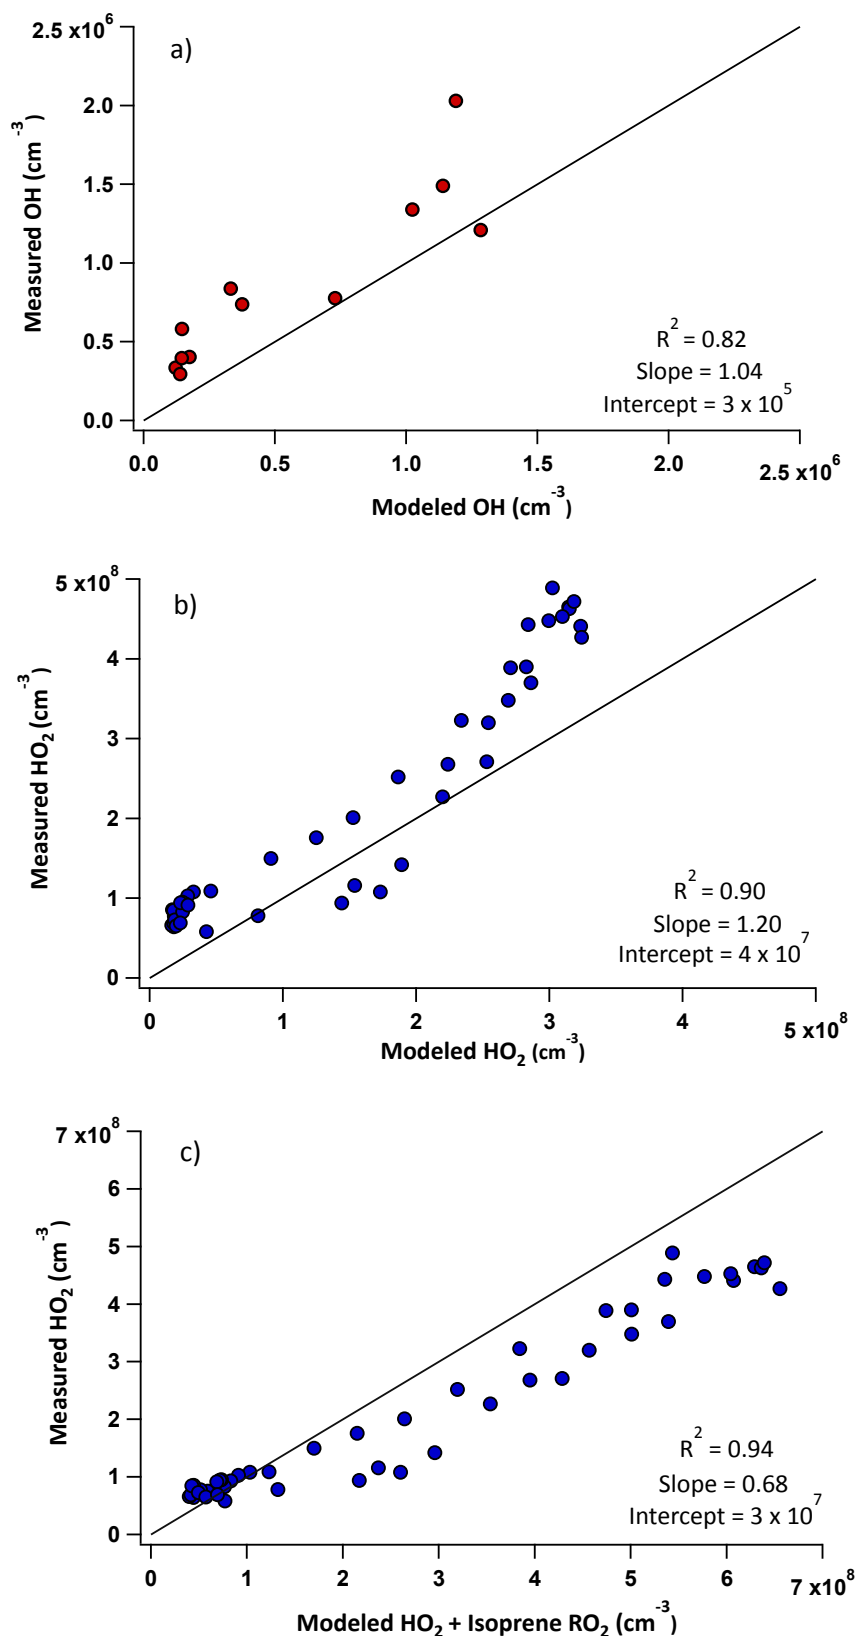

**Figure S6.** Linear regression of (a) median OH measurements during CABINEX 2009 and 0D model predictions, (b) median HO<sub>2</sub> measurements and 0D model predictions, and (c) median HO<sub>2</sub> measurements and HO<sub>2</sub> + isoprene RO<sub>2</sub> 0D model predictions. The 1:1 line is included in each plot for reference.



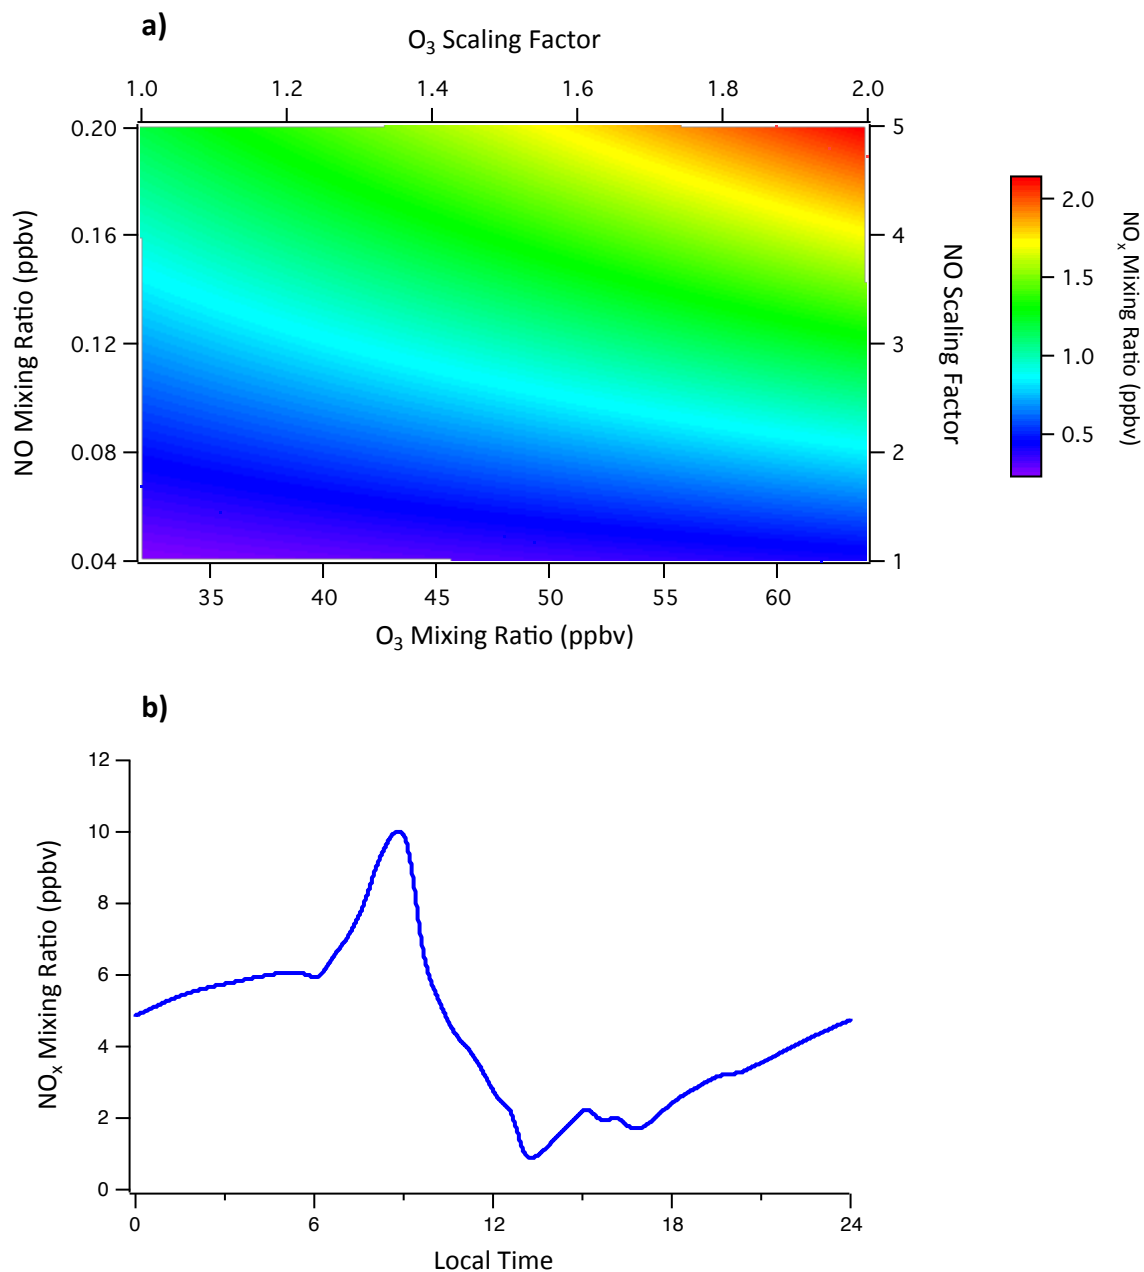

**Figure S7. (a)** Average  $\text{NO}_x$  mixing ratio above the canopy from 11:00-15:00 as a function of  $\text{NO}$  and  $\text{O}_3$  mixing ratios **(b)** Diurnal profile of total above-canopy  $\text{NO}_x$  for the most polluted sensitivity test (diurnal profiles of  $\text{O}_3$  and  $\text{NO}$  scaled by factors of 2 and 5, respectively).

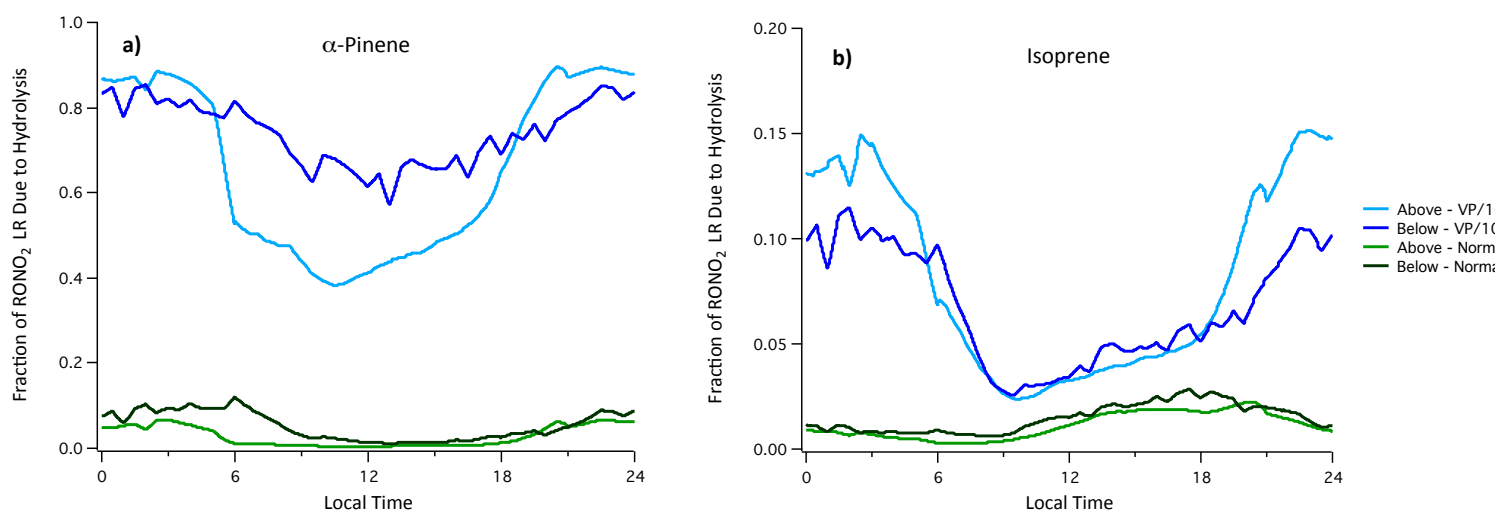

**Figure S8. (a)** Fraction of total  $\alpha$ -pinene RONO<sub>2</sub> loss rate due to heterogeneous hydrolysis. Green lines represent a scenario using vapor pressures as calculated by the SIMPOL.1 method, while blue lines represent a scenario with all vapor pressures decreased by a factor of 100. Lighter-colored lines indicate above-canopy conditions; darker-colored lines indicate below-canopy conditions. **(b)** Same as (a), but for isoprene RONO<sub>2</sub>. Note the different y-axes. Only tertiary isoprene nitrates are assumed to undergo hydrolysis in the model, whereas all  $\alpha$ -pinene nitrates hydrolyze.

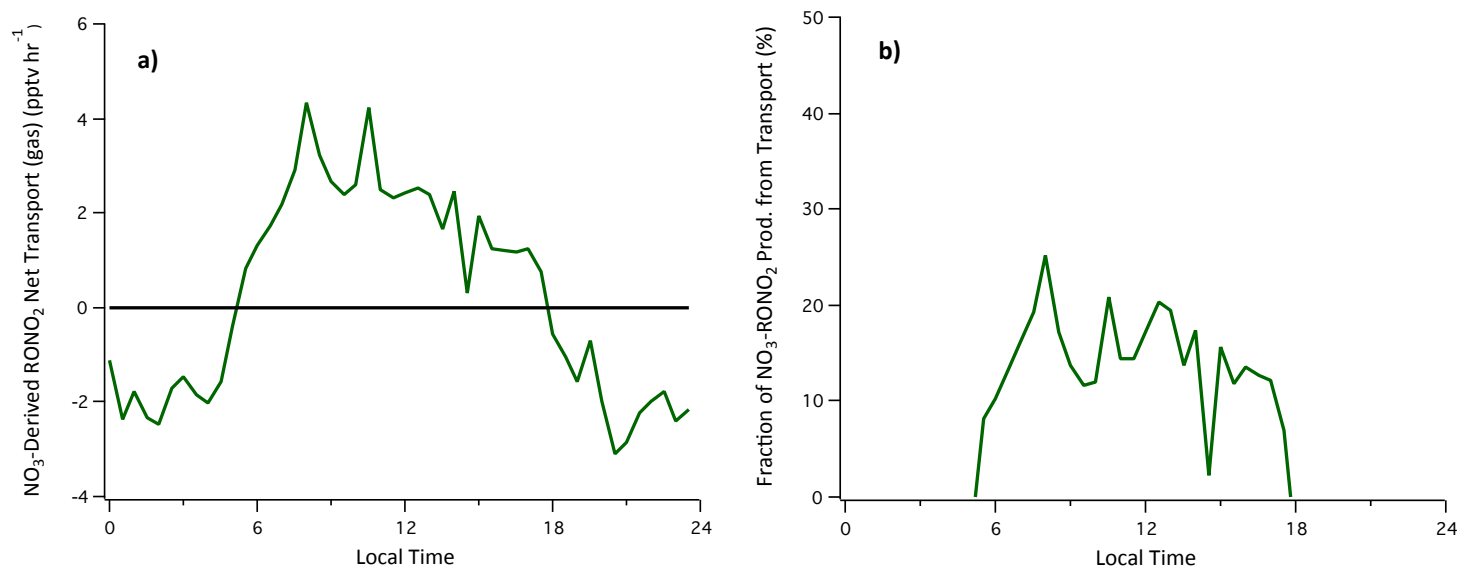

**Figure S9. a)** Net transport of  $\text{NO}_3$ -derived  $\text{RONO}_2$  above the canopy assuming all oxidation product vapor pressures are reduced by a factor of 100. Positive indicates transport from the below-canopy environment; negative indicates transport to the below-canopy environment. **b)** Percent of total  $\text{NO}_3$ -derived  $\text{RONO}_2$  production contributed by net transport from the below-canopy environment in this scenario.

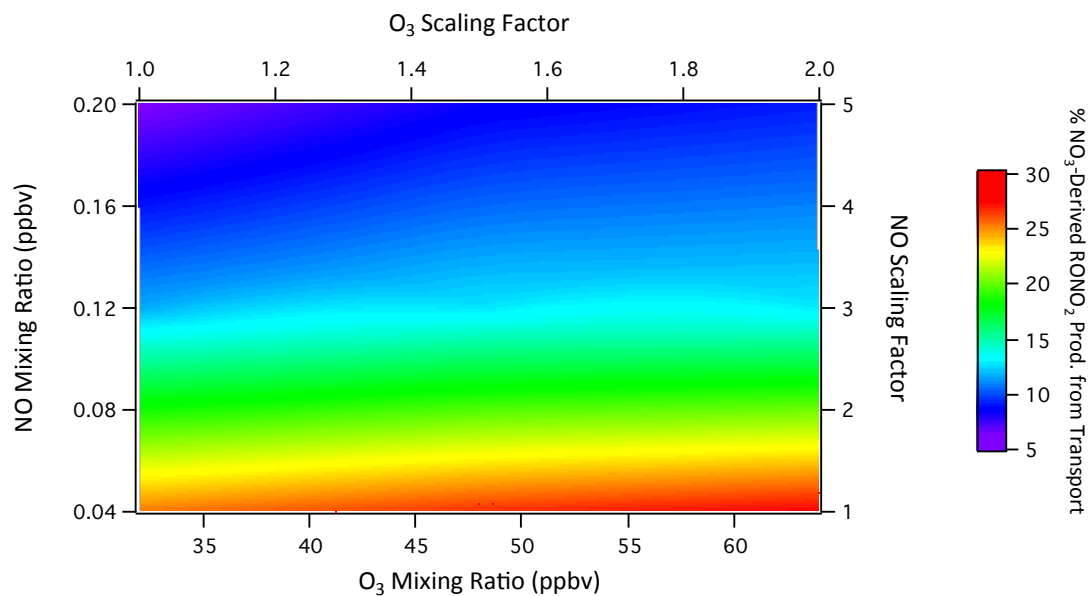

**Figure S10.** Percent of total NO<sub>3</sub>-derived RONO<sub>2</sub> production contributed by net transport from the below-canopy environment as a function of O<sub>3</sub> and NO mixing ratios. Values represent averages from 11:00 to 15:00.

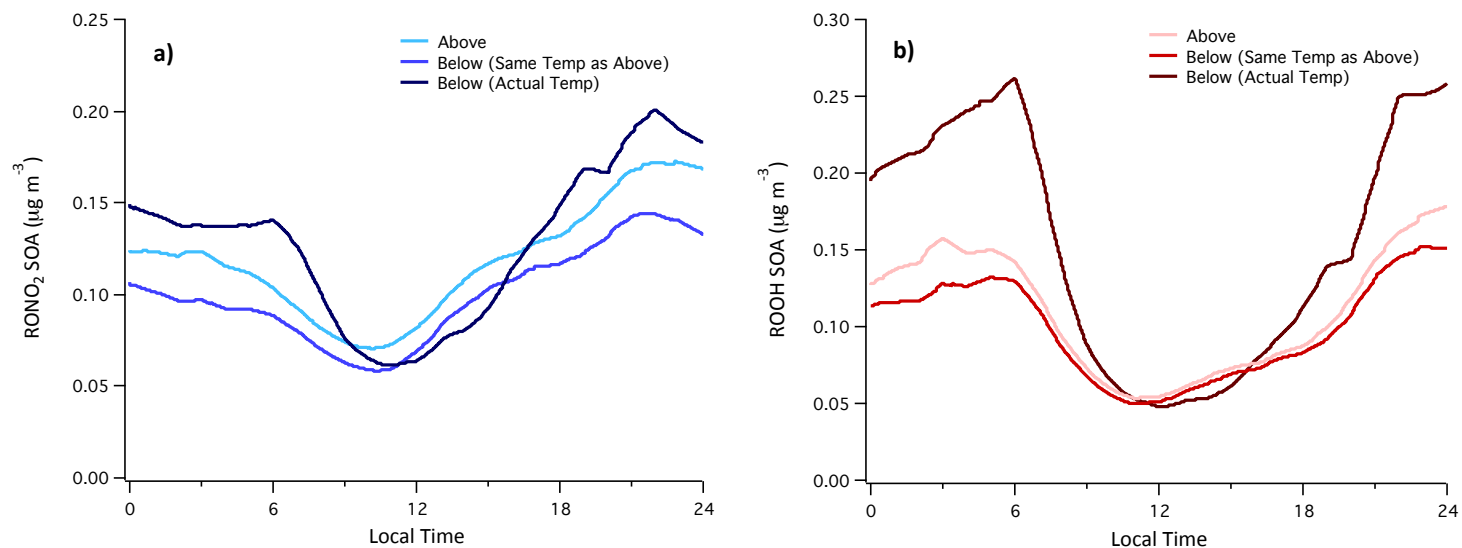

**Figure S11.** Effect of temperature on semi-volatile SOA formation from **(a)** RONO<sub>2</sub> oxidation products and **(b)** ROOH oxidation products. The line of intermediate color in each plot (i.e. “medium” darkness) notes the scenario using the same temperature above and below the canopy.

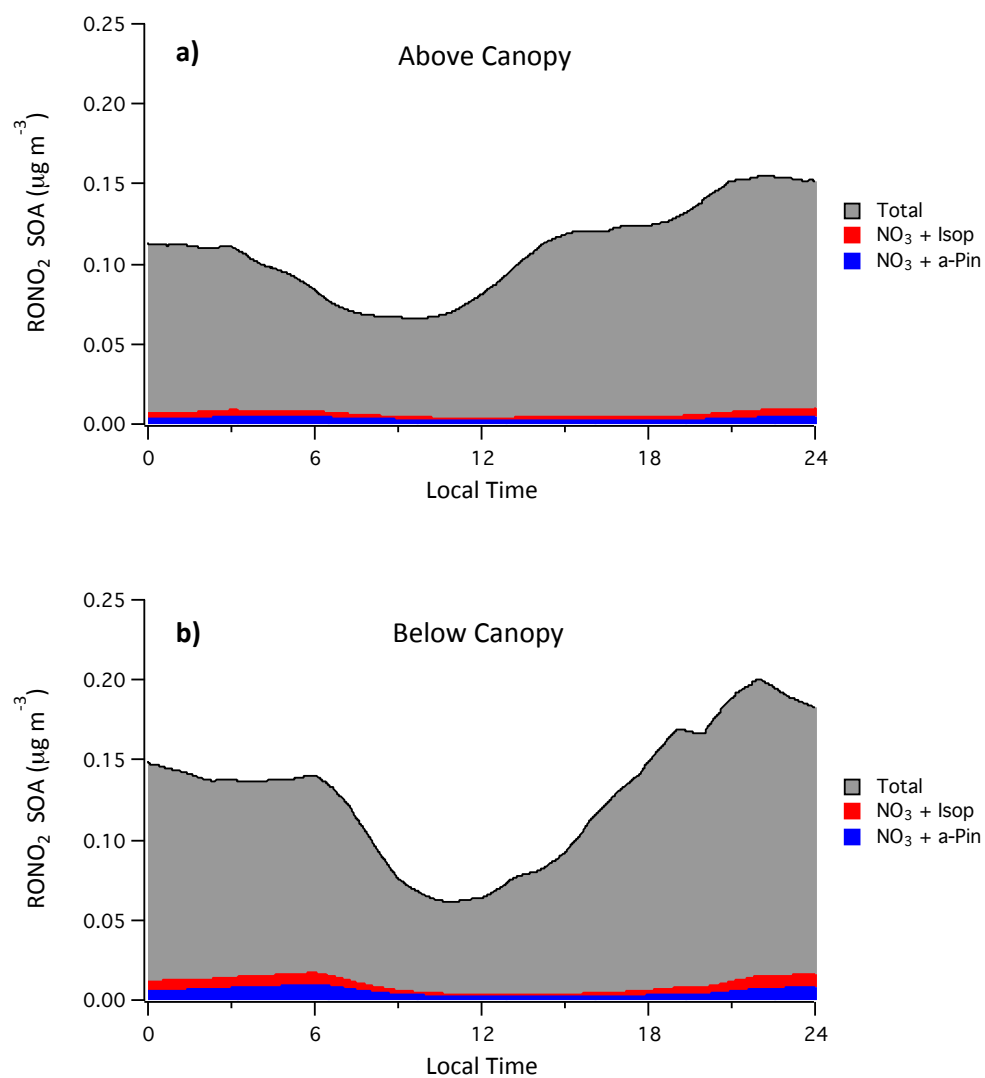

**Figure S12.** Diurnal profile of total RONO<sub>2</sub> SOA **(a)** above-canopy and **(b)** below-canopy including the specific contributions from NO<sub>3</sub> oxidation of isoprene and  $\alpha$ -pinene.

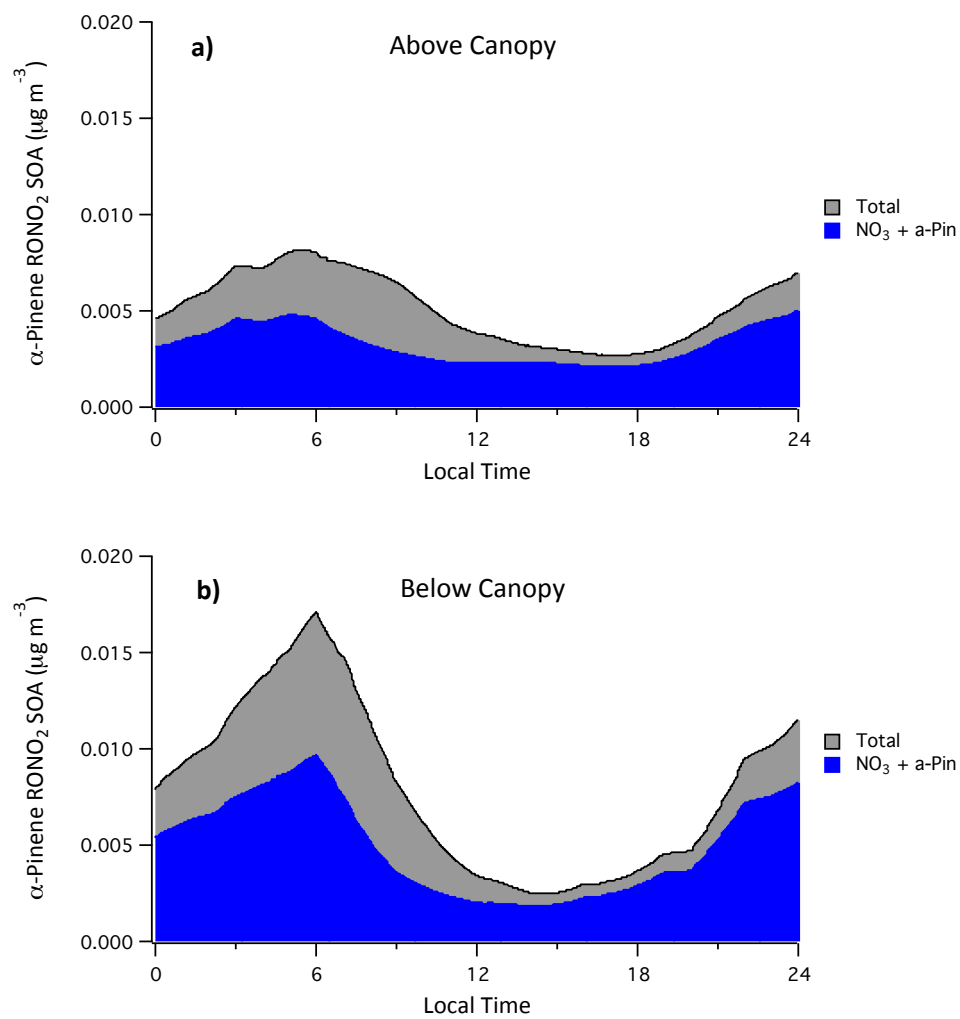

**Figure S13.** Contribution of  $\text{NO}_3$  oxidation to total  $\alpha$ -pinene  $\text{RONO}_2$  SOA mass above (a) and below (b) the canopy.

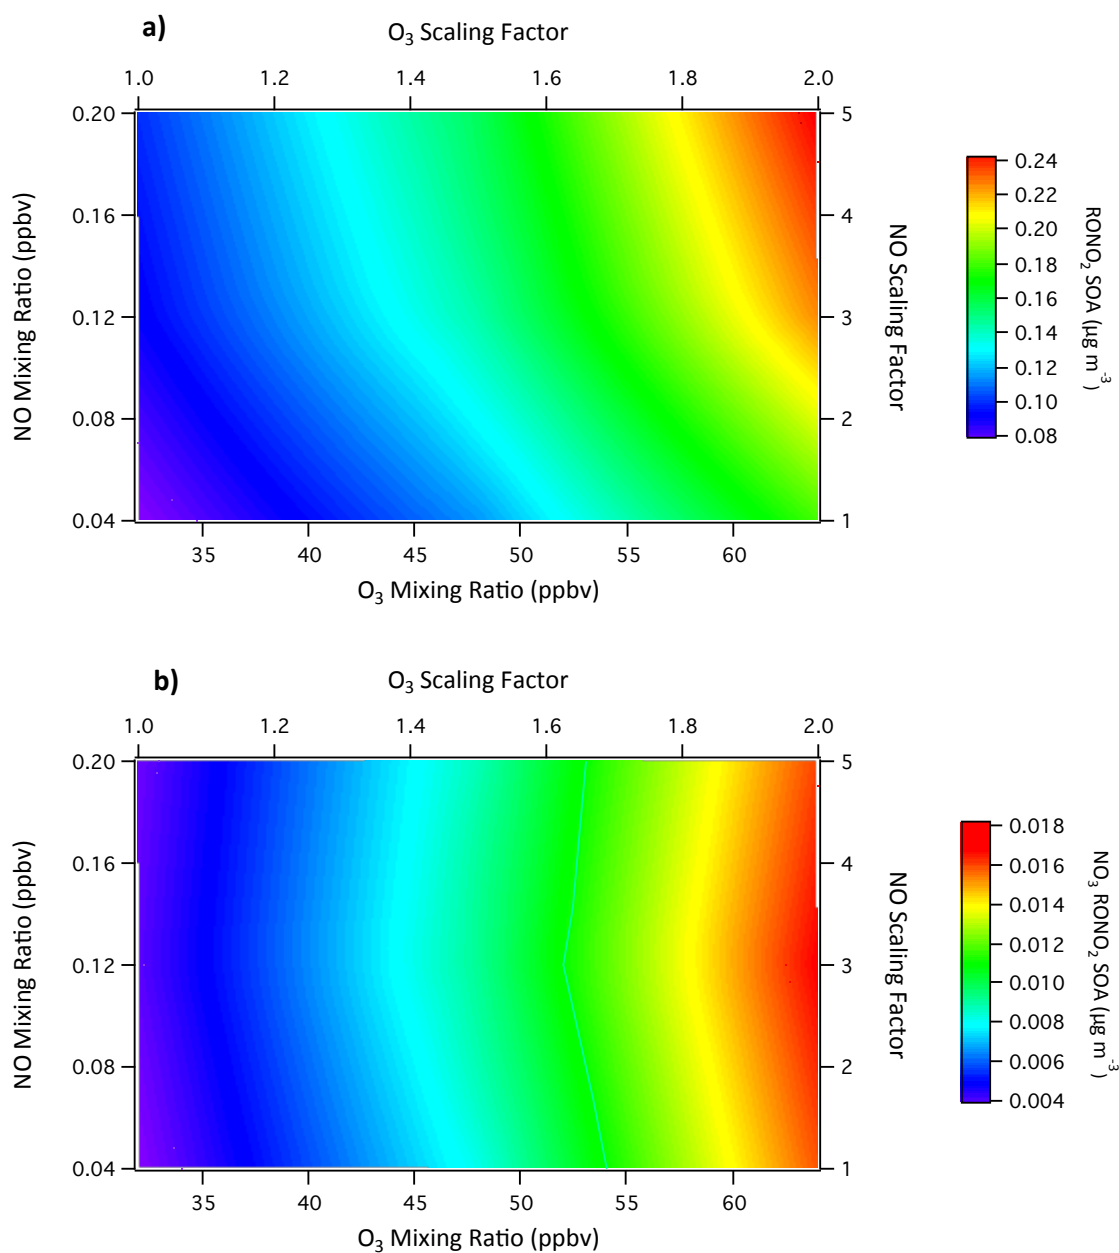

**Figure S14.** Mass loading of (a) RONO<sub>2</sub> SOA and (b) NO<sub>3</sub>-derived RONO<sub>2</sub> SOA below the canopy as a function of O<sub>3</sub> and NO mixing ratios. Values are averages from 11:00-15:00.



## Works Cited:

- Ashworth, K., Chung, S. H., Griffin, R. J., Chen, J., Forkel, R., Bryan, A. M., and Steiner, A. L.: FORest Canopy Atmosphere Transfer (FORCAsT) 1.0: a 1-D model of biosphere-atmosphere chemical exchange, *Geosci. Model Dev.*, 8, 3765-3784, doi:10.5194/gmd-8-3765-2015, 2015.
- Karl, T., Harley, P., Emmons, L., Thornton, B., Guenther, A., Basu, C., Turnipseed, A., and Jardine, K.: Efficient atmospheric cleansing of oxidized organic trace gases by vegetation, *Science*, 330, 6005, 816–819, doi:10.1126/science.1192534, 2010.
- Nguyen, T. B., Crounse, J. D., Teng, A. P., Clair, J. M. S., Paulot, F., Wolfe, G. M., and Wennberg, P. O.: Rapid deposition of oxidized biogenic compounds to a temperate forest, *P. Natl. Acad. Sci. USA*, 112, E392–E40, doi:10.1073/pnas.1418702112, 2015.
- Sander R.: *Compilation of Henry's Law Constants for Inorganic and Organic Species of Potential Importance in Environmental Chemistry* (Max Planck Inst Chem, Mainz, Germany), 1999.
